# Supplementary material for: Assessment of the safety climate in outpatient diagnostic services: Development and psychometric evaluation of a questionnaire
Source: Springer Nature journal article supplement (doi:10.1007/s00330-018-5646-1), 2018-08-07
Supplement: MOESM1 [file 16016848]

Dear collaborator,

With your work, you are making an important contribution to the quality of your radiology-service. At the same time, it is important that your service receives feedback about the extent to which the organization of work, communication, leadership, collaboration and the systemic level contribute to safety culture and thus to high quality work.

The following questionnaire leads you through these five dimensions of safety culture. Your answers are confidential.

When we talk about collaborators in the following questionnaire, we include all persons working in the institute, be it as employee or partner, working full- or part time.

Thanks for your collaboration,

The EQUAM Foundation

**Your gender**

female

male

I prefer not to answer

**How many years have you worked in your profession?**

less than a year

1-5 years

6-10 years

years

more than 21 years

**How many years have you worked at this service?**

less than a year

1-5 years

6-10 years

years

more than 21 years

**I am...**

a radiologist

a technical assistant

working in the call centre / at the phone

working in the administration

other (please specify) _________________________

In how far do you agree with the following statements?

|  | not at all | to a very limited extent | to a limited extent | to a moderate extent | to a considerable extent | to a great extent | to a very great extent |
| --- | --- | --- | --- | --- | --- | --- | --- |
| The performance of collaborators is impaired by excessive workload |  |  |  |  |  |  |  |
| Collaborators always have enough time to complete work tasks safely |  |  |  |  |  |  |  |
| The level of staffing in the service is sufficient to manage the workload safely |  |  |  |  |  |  |  |
| When pressure builds up, collaborators are expected to work faster even if it means working less accurately |  |  |  |  |  |  |  |
| Collaborators feel free to question the decisions of those with more authority |  |  |  |  |  |  |  |
| Collaborators are comfortable in expressing concerns about the way things are done to the service leadership |  |  |  |  |  |  |  |
| There is open communication between collaborators, their position notwithstanding |  |  |  |  |  |  |  |
| Collaborators are kept up to date about service developments |  |  |  |  |  |  |  |
| The service leadership communicates its long-term plans for the development of the service |  |  |  |  |  |  |  |
| The hierarchy in the service is a barrier to effective work |  |  |  |  |  |  |  |
| Highlighting a significant event will likely result in negative repercussions for the person raising it |  |  |  |  |  |  |  |
| The service leadership does not deal effectively with problem collaborators |  |  |  |  |  |  |  |
| When collaborators suggest ways to improve processes, the service leadership does not take this seriously |  |  |  |  |  |  |  |
| There is a low level of trust between practice team members |  |  |  |  |  |  |  |
| Collaborators frequently disregard rules, protocols and procedures |  |  |  |  |  |  |  |
| Collaborators treat each other with respect |  |  |  |  |  |  |  |
| Collaborators always support one another |  |  |  |  |  |  |  |
| Disagreements within the service team are resolved appropriately |  |  |  |  |  |  |  |
| Collaborators work well together at all positions within the practice |  |  |  |  |  |  |  |
| The service is a good place to work |  |  |  |  |  |  |  |
| Collaborators are generally satisfied with their jobs |  |  |  |  |  |  |  |
| Good teamwork is promoted and considered to be important by the service leadership |  |  |  |  |  |  |  |
| All collaborators are encouraged to highlight critical incidents that happen in the service |  |  |  |  |  |  |  |
| Processes help to prevent critical incidents from happening |  |  |  |  |  |  |  |
| The opinions of all concerned collaborators are taken into account for the development of processes |  |  |  |  |  |  |  |
| When processes are changing, the services take time to assess risks for patients, collaborators and the service in advance |  |  |  |  |  |  |  |
| All concerned collaborators have the opportunity to participate in the analysis of critical incidents |  |  |  |  |  |  |  |
| The quality and safety of patient care in the service is taken seriously |  |  |  |  |  |  |  |
| The practice supports the continuing educational development of all collaborators |  |  |  |  |  |  |  |
| The service encourages learning from the ideas and constructive critique of collaborators in all positions |  |  |  |  |  |  |  |
